# Supplementary material for: Validation of Infant and Young Child Feeding Questionnaire for the Assessment of Knowledge, Attitudes and Practices among Child Care Providers: The IYCF-CCPQ
Source: MDPI journal article supplement (doi:10.3390/ijerph16122147), 2019-06-17
Supplement: s1 [file s1]

# KNOWLEDGE

Check (✓) your answer choice. Answer all of the questions.

## SECTION A: BREASTFEEDING AND INFANT FORMULA

|                                                                           | True                                | False                               | Do not know              |
|---------------------------------------------------------------------------|-------------------------------------|-------------------------------------|--------------------------|
| 1. Colostrum has a high antibody content.                                 | <input checked="" type="checkbox"/> | <input type="checkbox"/>            | <input type="checkbox"/> |
| 2. Breast milk causes constipation in infants.                            | <input type="checkbox"/>            | <input checked="" type="checkbox"/> | <input type="checkbox"/> |
| 3. Breastfeeding reduces the risk of infants getting lung infections.     | <input checked="" type="checkbox"/> | <input type="checkbox"/>            | <input type="checkbox"/> |
| 4. Breast milk that looks diluted is less nutritious.                     | <input type="checkbox"/>            | <input checked="" type="checkbox"/> | <input type="checkbox"/> |
| 5. Breastfeeding causes infants to have low body weights.                 | <input type="checkbox"/>            | <input checked="" type="checkbox"/> | <input type="checkbox"/> |
| 6. The common cold risk can be reduced by breast milk.                    | <input checked="" type="checkbox"/> | <input type="checkbox"/>            | <input type="checkbox"/> |
| 7. Breast milk is not easily contaminated when compared to formula.       | <input checked="" type="checkbox"/> | <input type="checkbox"/>            | <input type="checkbox"/> |
| 8. Breastfeeding calms the infant.                                        | <input checked="" type="checkbox"/> | <input type="checkbox"/>            | <input type="checkbox"/> |
| 9. Exclusive breastfeeding can space pregnancies.                         | <input checked="" type="checkbox"/> | <input type="checkbox"/>            | <input type="checkbox"/> |
| 10. Mothers who breastfeed are at a higher risk of getting breast cancer. | <input type="checkbox"/>            | <input checked="" type="checkbox"/> | <input type="checkbox"/> |
| 11. Breastfeeding infants have daily bowel movements.                     | <input checked="" type="checkbox"/> | <input type="checkbox"/>            | <input type="checkbox"/> |
| 12. Infants will have normal weight gain with optimal breastfeeding.      | <input checked="" type="checkbox"/> | <input type="checkbox"/>            | <input type="checkbox"/> |
| 13. Breastfeeding increases an infant's intelligence.                     | <input checked="" type="checkbox"/> | <input type="checkbox"/>            | <input type="checkbox"/> |
| 14. Infants sleep well when they are getting sufficient breast milk.      | <input checked="" type="checkbox"/> | <input type="checkbox"/>            | <input type="checkbox"/> |
| 15. Breastfeeding causes infant to have diarrhea.                         | <input type="checkbox"/>            | <input checked="" type="checkbox"/> | <input type="checkbox"/> |
| 16. Breastfeeding reduces the incidence of child abuse.                   | <input checked="" type="checkbox"/> | <input type="checkbox"/>            | <input type="checkbox"/> |
| 17. Breastfeeding causes maldevelopment of the gums and teeth.            | <input type="checkbox"/>            | <input checked="" type="checkbox"/> | <input type="checkbox"/> |
| 18. Colostrum is difficult to digest.                                     | <input type="checkbox"/>            | <input checked="" type="checkbox"/> | <input type="checkbox"/> |
| 19. Breastfeeding should continue even when the child is sick.            | <input checked="" type="checkbox"/> | <input type="checkbox"/>            | <input type="checkbox"/> |

|                                                                                                             | True                                | False                               | Do not know              |
|-------------------------------------------------------------------------------------------------------------|-------------------------------------|-------------------------------------|--------------------------|
| 20. Formula provides better protection from allergies when compared to breast milk.                         | <input type="checkbox"/>            | <input checked="" type="checkbox"/> | <input type="checkbox"/> |
| 21. Infants should be given only breast milk from birth until 6 months of age.                              | <input checked="" type="checkbox"/> | <input type="checkbox"/>            | <input type="checkbox"/> |
| 22. Breastfeeding should be in accordance with the infant's demand.                                         | <input checked="" type="checkbox"/> | <input type="checkbox"/>            | <input type="checkbox"/> |
| 23. The use of artificial teats interferes with tooth development.                                          | <input checked="" type="checkbox"/> | <input type="checkbox"/>            | <input type="checkbox"/> |
| 24. Infants can be given plain water during the exclusive breastfeeding period.                             | <input type="checkbox"/>            | <input checked="" type="checkbox"/> | <input type="checkbox"/> |
| 25. Exclusive breastfeeding means that infants are only given breast milk from birth to 6 months of age.    | <input checked="" type="checkbox"/> | <input type="checkbox"/>            | <input type="checkbox"/> |
| 26. Colostrum can cause infants to have difficulty defecating.                                              | <input type="checkbox"/>            | <input checked="" type="checkbox"/> | <input type="checkbox"/> |
| 27. Breastfeeding should be continued until the infant is 2 years old or older.                             | <input checked="" type="checkbox"/> | <input type="checkbox"/>            | <input type="checkbox"/> |
| 28. The mother has to breastfeed every 3 hours.                                                             | <input type="checkbox"/>            | <input checked="" type="checkbox"/> | <input type="checkbox"/> |
| 29. The correct position during breastfeeding ensures effective breastfeeding.                              | <input checked="" type="checkbox"/> | <input type="checkbox"/>            | <input type="checkbox"/> |
| 30. Expressed breast milk that has been thawed can be stored again.                                         | <input type="checkbox"/>            | <input checked="" type="checkbox"/> | <input type="checkbox"/> |
| 31. The expressed breast milk container needs to be labelled with infant's name, time, and date.            | <input checked="" type="checkbox"/> | <input type="checkbox"/>            | <input type="checkbox"/> |
| 32. Frozen expressed breast milk can be thawed on the stove.                                                | <input type="checkbox"/>            | <input checked="" type="checkbox"/> | <input type="checkbox"/> |
| 33. Breastfeeding should be continued up to 2 years or more in addition to complementary food.              | <input checked="" type="checkbox"/> | <input type="checkbox"/>            | <input type="checkbox"/> |
| 34. The use of an artificial teat facilitates breastfeeding.                                                | <input type="checkbox"/>            | <input checked="" type="checkbox"/> | <input type="checkbox"/> |
| 35. Expressed breast milk can be stored for up to 3 months in the freezer of a 2-door refrigerator.         | <input checked="" type="checkbox"/> | <input type="checkbox"/>            | <input type="checkbox"/> |
| 36. Providing plain water after each breastfeeding session is encouraged.                                   | <input type="checkbox"/>            | <input checked="" type="checkbox"/> | <input type="checkbox"/> |
| 37. Newly expressed breast milk can be mixed together in a container with previously expressed breast milk. | <input type="checkbox"/>            | <input checked="" type="checkbox"/> | <input type="checkbox"/> |
| 38. Formula is nutritious because it contains added docosahexaenoic acid (DHA).                             | <input type="checkbox"/>            | <input checked="" type="checkbox"/> | <input type="checkbox"/> |

|                                                                                                                                                   | True                                | False                               | Do not know              |
|---------------------------------------------------------------------------------------------------------------------------------------------------|-------------------------------------|-------------------------------------|--------------------------|
| 39. Frozen expressed breast milk can be thawed in the microwave.                                                                                  | <input type="checkbox"/>            | <input checked="" type="checkbox"/> | <input type="checkbox"/> |
| 40. Expressed breast milk that has been thawed completely should be consumed in an hour.                                                          | <input checked="" type="checkbox"/> | <input type="checkbox"/>            | <input type="checkbox"/> |
| 41. Formula can be kept longer at room temperature when compared to breast milk.                                                                  | <input type="checkbox"/>            | <input checked="" type="checkbox"/> | <input type="checkbox"/> |
| 42. Frozen expressed breast milk that has been thawed can be stored in the chilled section of the refrigerator for 24 hours.                      | <input checked="" type="checkbox"/> | <input type="checkbox"/>            | <input type="checkbox"/> |
| 43. Expressed breast milk stored in the chilled section of the refrigerator needs to be consumed immediately if the power supply is disconnected. | <input checked="" type="checkbox"/> | <input type="checkbox"/>            | <input type="checkbox"/> |
| 44. Frozen expressed breast milk can be thawed in lukewarm water.                                                                                 | <input checked="" type="checkbox"/> | <input type="checkbox"/>            | <input type="checkbox"/> |
| 45. Formula is a kind of complementary food.                                                                                                      | <input type="checkbox"/>            | <input checked="" type="checkbox"/> | <input type="checkbox"/> |
| 46. The “first in, first out” method refers to expressed breast milk that has been stored earlier being consumed first.                           | <input checked="" type="checkbox"/> | <input type="checkbox"/>            | <input type="checkbox"/> |
| 47. Frozen expressed breast milk that has been thawed can be refrozen again.                                                                      | <input type="checkbox"/>            | <input checked="" type="checkbox"/> | <input type="checkbox"/> |
| 48. The preparation of formula should follow the guidelines provided.                                                                             | <input checked="" type="checkbox"/> | <input type="checkbox"/>            | <input type="checkbox"/> |
| 49. Expressed breast milk can last for 4 hours at room temperature.                                                                               | <input checked="" type="checkbox"/> | <input type="checkbox"/>            | <input type="checkbox"/> |
| 50. Formula has high quality protein.                                                                                                             | <input type="checkbox"/>            | <input checked="" type="checkbox"/> | <input type="checkbox"/> |
| 51. The formula powder should be put in the bottle first, before adding the water.                                                                | <input type="checkbox"/>            | <input checked="" type="checkbox"/> | <input type="checkbox"/> |
| 52. Boiling water can be poured directly into the milk bottle when preparing the formula.                                                         | <input type="checkbox"/>            | <input checked="" type="checkbox"/> | <input type="checkbox"/> |
| 53. The temperature of the milk should be checked by putting a few drops of it onto the carer’s wrist.                                            | <input checked="" type="checkbox"/> | <input type="checkbox"/>            | <input type="checkbox"/> |
| 54. Formula should be prepared with water heated to 70°C.                                                                                         | <input checked="" type="checkbox"/> | <input type="checkbox"/>            | <input type="checkbox"/> |
| 55. Formula is not easily contaminated.                                                                                                           | <input type="checkbox"/>            | <input checked="" type="checkbox"/> | <input type="checkbox"/> |
| 56. The outside of the milk bottle should be dried before giving it to the infant.                                                                | <input checked="" type="checkbox"/> | <input type="checkbox"/>            | <input type="checkbox"/> |

|                                                                                                                     | True                                | False                               | Do not know              |
|---------------------------------------------------------------------------------------------------------------------|-------------------------------------|-------------------------------------|--------------------------|
| 57. After preparing the formula, the bottle should be placed under running tap water to lower the milk temperature. | <input checked="" type="checkbox"/> | <input type="checkbox"/>            | <input type="checkbox"/> |
| 58. Milk bottles should be sterilized once a week.                                                                  | <input checked="" type="checkbox"/> | <input type="checkbox"/>            | <input type="checkbox"/> |
| 59. Bisphenol A (BPA)-free milk bottles are safe for use.                                                           | <input checked="" type="checkbox"/> | <input type="checkbox"/>            | <input type="checkbox"/> |
| 60. Sterilized bottles can be stored in open spaces.                                                                | <input type="checkbox"/>            | <input checked="" type="checkbox"/> | <input type="checkbox"/> |
| 61. Milk bottles need to be boiled in water for proper sterilization.                                               | <input checked="" type="checkbox"/> | <input type="checkbox"/>            | <input type="checkbox"/> |
| 62. Milk bottles need to be replaced every 6 months if they are not scratched.                                      | <input checked="" type="checkbox"/> | <input type="checkbox"/>            | <input type="checkbox"/> |
| 63. Milk bottles can be cleansed using a soft sponge.                                                               | <input checked="" type="checkbox"/> | <input type="checkbox"/>            | <input type="checkbox"/> |
| 64. Milk bottles can be sterilized using “steam sterilization.”                                                     | <input checked="" type="checkbox"/> | <input type="checkbox"/>            | <input type="checkbox"/> |

## **SECTION B: COMPLEMENTARY FOOD FOR INFANTS AND CHILDREN**

|                                                                                                       | True                                | False                               | Do not know              |
|-------------------------------------------------------------------------------------------------------|-------------------------------------|-------------------------------------|--------------------------|
| 1. Complementary food needs to be introduced when the infant is 6 months old.                         | <input checked="" type="checkbox"/> | <input type="checkbox"/>            | <input type="checkbox"/> |
| 2. A balanced diet reduces the risk of skin disease (eczema) in children.                             | <input checked="" type="checkbox"/> | <input type="checkbox"/>            | <input type="checkbox"/> |
| 3. A child’s daily diet should follow the food pyramid.                                               | <input checked="" type="checkbox"/> | <input type="checkbox"/>            | <input type="checkbox"/> |
| 4. Scaly skin problems can occur in children who do not receive a balanced diet.                      | <input checked="" type="checkbox"/> | <input type="checkbox"/>            | <input type="checkbox"/> |
| 5. Complementary feeding can be started at 4 months of age.                                           | <input type="checkbox"/>            | <input checked="" type="checkbox"/> | <input type="checkbox"/> |
| 6. After 6 months, breast milk alone is insufficient to provide all of an infant’s nutritional needs. | <input checked="" type="checkbox"/> | <input type="checkbox"/>            | <input type="checkbox"/> |
| 7. Fruits can be given to a 7-month-old infant.                                                       | <input checked="" type="checkbox"/> | <input type="checkbox"/>            | <input type="checkbox"/> |
| 8. Tea/coffee can be given to children.                                                               | <input type="checkbox"/>            | <input checked="" type="checkbox"/> | <input type="checkbox"/> |
| 9. One teaspoon of fat/oil should be added to an infant’s daily meals.                                | <input checked="" type="checkbox"/> | <input type="checkbox"/>            | <input type="checkbox"/> |
| 10. At the age of 1 year, food needs to be mashed.                                                    | <input type="checkbox"/>            | <input checked="" type="checkbox"/> | <input type="checkbox"/> |
| 11. Family food can be given to a 9-month-old infant.                                                 | <input type="checkbox"/>            | <input checked="" type="checkbox"/> | <input type="checkbox"/> |

|                                                                                                         | True                                | False                               | Do not know              |
|---------------------------------------------------------------------------------------------------------|-------------------------------------|-------------------------------------|--------------------------|
| 12. Canned drinks can be given to children.                                                             | <input type="checkbox"/>            | <input checked="" type="checkbox"/> | <input type="checkbox"/> |
| 13. A soft diet should be continued for infants aged 12 months and older.                               | <input type="checkbox"/>            | <input checked="" type="checkbox"/> | <input type="checkbox"/> |
| 14. Prawns can be given to a 10-month-old infant.                                                       | <input type="checkbox"/>            | <input checked="" type="checkbox"/> | <input type="checkbox"/> |
| 15. Try different combinations of foods, textures, and flavors if the children refuse to eat.           | <input checked="" type="checkbox"/> | <input type="checkbox"/>            | <input type="checkbox"/> |
| 16. Finger food can be given to a 9-month-old infant.                                                   | <input checked="" type="checkbox"/> | <input type="checkbox"/>            | <input type="checkbox"/> |
| 17. Honey can be given to an 8-month-old infant.                                                        | <input type="checkbox"/>            | <input checked="" type="checkbox"/> | <input type="checkbox"/> |
| 18. A soft diet needs to be given when the child is sick.                                               | <input checked="" type="checkbox"/> | <input type="checkbox"/>            | <input type="checkbox"/> |
| 19. Eggs can be given to a 9-month-old infant.                                                          | <input type="checkbox"/>            | <input checked="" type="checkbox"/> | <input type="checkbox"/> |
| 20. Carers need to accompany children when they are eating nuts.                                        | <input checked="" type="checkbox"/> | <input type="checkbox"/>            | <input type="checkbox"/> |
| 21. A 9-month-old infant is allowed to hold food and feed him or herself.                               | <input checked="" type="checkbox"/> | <input type="checkbox"/>            | <input type="checkbox"/> |
| 22. Whole nuts can be given to a 10-month-old infant.                                                   | <input type="checkbox"/>            | <input checked="" type="checkbox"/> | <input type="checkbox"/> |
| 23. The food pyramid has 3 main levels.                                                                 | <input type="checkbox"/>            | <input checked="" type="checkbox"/> | <input type="checkbox"/> |
| 24. The rice and grain group provides energy for children.                                              | <input checked="" type="checkbox"/> | <input type="checkbox"/>            | <input type="checkbox"/> |
| 25. Foods in the vegetable group need to be consumed more often than those in the rice and grain group. | <input checked="" type="checkbox"/> | <input type="checkbox"/>            | <input type="checkbox"/> |
| 26. Cooked food should not be left at room temperature for longer than 2 hours.                         | <input checked="" type="checkbox"/> | <input type="checkbox"/>            | <input type="checkbox"/> |
| 27. Give food more frequently when a child is recovering from an illness.                               | <input checked="" type="checkbox"/> | <input type="checkbox"/>            | <input type="checkbox"/> |
| 28. Interacting with children during meal times can encourage them to eat.                              | <input checked="" type="checkbox"/> | <input type="checkbox"/>            | <input type="checkbox"/> |
| 29. The same cutting board can be used for cutting raw meat and fruits.                                 | <input type="checkbox"/>            | <input checked="" type="checkbox"/> | <input type="checkbox"/> |
| 30. A cracked plate can be used to prepare food for children.                                           | <input type="checkbox"/>            | <input checked="" type="checkbox"/> | <input type="checkbox"/> |
| 31. Encourage children to drink plenty of water when they are sick.                                     | <input checked="" type="checkbox"/> | <input type="checkbox"/>            | <input type="checkbox"/> |
| 32. Children need to be penalized if they refuse to eat.                                                | <input type="checkbox"/>            | <input checked="" type="checkbox"/> | <input type="checkbox"/> |

|                                                                                       | True                                | False                               | Do not know              |
|---------------------------------------------------------------------------------------|-------------------------------------|-------------------------------------|--------------------------|
| 33. Different methods of encouragement should be attempted if a child refuses to eat. | <input checked="" type="checkbox"/> | <input type="checkbox"/>            | <input type="checkbox"/> |
| 34. Eating while watching television helps children to eat.                           | <input type="checkbox"/>            | <input checked="" type="checkbox"/> | <input type="checkbox"/> |
| 35. Children should be encouraged to feed themselves their own food.                  | <input checked="" type="checkbox"/> | <input type="checkbox"/>            | <input type="checkbox"/> |

# ATTITUDE

**Answer all of the questions according to the scale below. Check (✓) the box with your answer choice.**

## **SECTION A: BREASTFEEDING AND INFANT FORMULA**

| <b>1</b>                 | <b>2</b>                                                                                                 | <b>3</b>        | <b>4</b>                            | <b>5</b>                 |                          |                          |                                     |
|--------------------------|----------------------------------------------------------------------------------------------------------|-----------------|-------------------------------------|--------------------------|--------------------------|--------------------------|-------------------------------------|
| <b>Strongly disagree</b> | <b>Disagree</b>                                                                                          | <b>Not sure</b> | <b>Agree</b>                        | <b>Strongly agree</b>    |                          |                          |                                     |
|                          |                                                                                                          |                 | <b>1</b>                            | <b>2</b>                 | <b>3</b>                 | <b>4</b>                 | <b>5</b>                            |
| 1.                       | I believe mother's milk is important for an infant.                                                      |                 | <input type="checkbox"/>            | <input type="checkbox"/> | <input type="checkbox"/> | <input type="checkbox"/> | <input checked="" type="checkbox"/> |
| 2.                       | I think infants who drink mother's milk are easier to manage.                                            |                 | <input type="checkbox"/>            | <input type="checkbox"/> | <input type="checkbox"/> | <input type="checkbox"/> | <input checked="" type="checkbox"/> |
| 3.                       | I believe that breast milk is economical.                                                                |                 | <input type="checkbox"/>            | <input type="checkbox"/> | <input type="checkbox"/> | <input type="checkbox"/> | <input checked="" type="checkbox"/> |
| 4.                       | I assume breastfeeding requires expensive equipment.                                                     |                 | <input checked="" type="checkbox"/> | <input type="checkbox"/> | <input type="checkbox"/> | <input type="checkbox"/> | <input type="checkbox"/>            |
| 5.                       | I think breastfeeding is something outdated.                                                             |                 | <input checked="" type="checkbox"/> | <input type="checkbox"/> | <input type="checkbox"/> | <input type="checkbox"/> | <input type="checkbox"/>            |
| 6.                       | I think expressed breast milk is easier to manage than formula.                                          |                 | <input type="checkbox"/>            | <input type="checkbox"/> | <input type="checkbox"/> | <input type="checkbox"/> | <input checked="" type="checkbox"/> |
| 7.                       | I think exclusive breastfeeding is the best option for working mothers.                                  |                 | <input type="checkbox"/>            | <input type="checkbox"/> | <input type="checkbox"/> | <input type="checkbox"/> | <input checked="" type="checkbox"/> |
| 8.                       | I think breast milk increases the bond between mothers and infants.                                      |                 | <input type="checkbox"/>            | <input type="checkbox"/> | <input type="checkbox"/> | <input type="checkbox"/> | <input checked="" type="checkbox"/> |
| 9.                       | I think breastfeeding is tiring.                                                                         |                 | <input checked="" type="checkbox"/> | <input type="checkbox"/> | <input type="checkbox"/> | <input type="checkbox"/> | <input type="checkbox"/>            |
| 10.                      | I think infants who drink formula choke more easily.                                                     |                 | <input type="checkbox"/>            | <input type="checkbox"/> | <input type="checkbox"/> | <input type="checkbox"/> | <input checked="" type="checkbox"/> |
| 11.                      | I think taking care of a breastfed infant is more difficult than taking care of those who drink formula. |                 | <input checked="" type="checkbox"/> | <input type="checkbox"/> | <input type="checkbox"/> | <input type="checkbox"/> | <input type="checkbox"/>            |
| 12.                      | I believe breast milk is nutritious.                                                                     |                 | <input type="checkbox"/>            | <input type="checkbox"/> | <input type="checkbox"/> | <input type="checkbox"/> | <input checked="" type="checkbox"/> |
| 13.                      | I think breastfeeding is a waste of time.                                                                |                 | <input checked="" type="checkbox"/> | <input type="checkbox"/> | <input type="checkbox"/> | <input type="checkbox"/> | <input type="checkbox"/>            |
| 14.                      | I believe infants who drink breast milk are healthier.                                                   |                 | <input type="checkbox"/>            | <input type="checkbox"/> | <input type="checkbox"/> | <input type="checkbox"/> | <input checked="" type="checkbox"/> |
| 15.                      | I think breastfeeding is embarrassing.                                                                   |                 | <input checked="" type="checkbox"/> | <input type="checkbox"/> | <input type="checkbox"/> | <input type="checkbox"/> | <input type="checkbox"/>            |
| 16.                      | I am proud to see working mothers continue breastfeeding.                                                |                 | <input type="checkbox"/>            | <input type="checkbox"/> | <input type="checkbox"/> | <input type="checkbox"/> | <input checked="" type="checkbox"/> |

| 1                                                                                                  | 2                                   | 3                        | 4                        | 5                        |                          |                          |                                     |
|----------------------------------------------------------------------------------------------------|-------------------------------------|--------------------------|--------------------------|--------------------------|--------------------------|--------------------------|-------------------------------------|
| Strongly disagree                                                                                  | Disagree                            | Not sure                 | Agree                    | Strongly agree           |                          |                          |                                     |
|                                                                                                    |                                     |                          | 1                        | 2                        | 3                        | 4                        | 5                                   |
| 17. I feel that it is easy to handle expressed breast milk.                                        | <input type="checkbox"/>            | <input type="checkbox"/> | <input type="checkbox"/> | <input type="checkbox"/> | <input type="checkbox"/> | <input type="checkbox"/> | <input checked="" type="checkbox"/> |
| 18. I do not like seeing mothers spend time on breastfeeding.                                      | <input checked="" type="checkbox"/> | <input type="checkbox"/> | <input type="checkbox"/> | <input type="checkbox"/> | <input type="checkbox"/> | <input type="checkbox"/> | <input type="checkbox"/>            |
| 19. I am happy that breastfed infants grow well.                                                   | <input type="checkbox"/>            | <input type="checkbox"/> | <input type="checkbox"/> | <input type="checkbox"/> | <input type="checkbox"/> | <input type="checkbox"/> | <input checked="" type="checkbox"/> |
| 20. I am happy that breastfed infants rarely have fevers.                                          | <input type="checkbox"/>            | <input type="checkbox"/> | <input type="checkbox"/> | <input type="checkbox"/> | <input type="checkbox"/> | <input type="checkbox"/> | <input checked="" type="checkbox"/> |
| 21. I am proud to see mothers who breastfeed.                                                      | <input type="checkbox"/>            | <input type="checkbox"/> | <input type="checkbox"/> | <input type="checkbox"/> | <input type="checkbox"/> | <input type="checkbox"/> | <input checked="" type="checkbox"/> |
| 22. I am embarrassed to see mothers breastfeeding in this childcare center.                        | <input checked="" type="checkbox"/> | <input type="checkbox"/> | <input type="checkbox"/> | <input type="checkbox"/> | <input type="checkbox"/> | <input type="checkbox"/> | <input type="checkbox"/>            |
| 23. I enjoy taking care of breastfed infants.                                                      | <input type="checkbox"/>            | <input type="checkbox"/> | <input type="checkbox"/> | <input type="checkbox"/> | <input type="checkbox"/> | <input type="checkbox"/> | <input checked="" type="checkbox"/> |
| 24. I will support the practice of breastfeeding in childcare centers.                             | <input type="checkbox"/>            | <input type="checkbox"/> | <input type="checkbox"/> | <input type="checkbox"/> | <input type="checkbox"/> | <input type="checkbox"/> | <input checked="" type="checkbox"/> |
| 25. I will encourage mothers to breastfeed in this childcare center.                               | <input type="checkbox"/>            | <input type="checkbox"/> | <input type="checkbox"/> | <input type="checkbox"/> | <input type="checkbox"/> | <input type="checkbox"/> | <input checked="" type="checkbox"/> |
| 26. I will recommend that mothers join the breastfeeding support group.                            | <input type="checkbox"/>            | <input type="checkbox"/> | <input type="checkbox"/> | <input type="checkbox"/> | <input type="checkbox"/> | <input type="checkbox"/> | <input checked="" type="checkbox"/> |
| 27. I will increase my knowledge of breastfeeding.                                                 | <input type="checkbox"/>            | <input type="checkbox"/> | <input type="checkbox"/> | <input type="checkbox"/> | <input type="checkbox"/> | <input type="checkbox"/> | <input checked="" type="checkbox"/> |
| 28. I will handle expressed breast milk with the utmost care.                                      | <input type="checkbox"/>            | <input type="checkbox"/> | <input type="checkbox"/> | <input type="checkbox"/> | <input type="checkbox"/> | <input type="checkbox"/> | <input checked="" type="checkbox"/> |
| 29. I will participate in the breastfeeding training program.                                      | <input type="checkbox"/>            | <input type="checkbox"/> | <input type="checkbox"/> | <input type="checkbox"/> | <input type="checkbox"/> | <input type="checkbox"/> | <input checked="" type="checkbox"/> |
| 30. I will receive the expressed breast milk to be used in this childcare center.                  | <input type="checkbox"/>            | <input type="checkbox"/> | <input type="checkbox"/> | <input type="checkbox"/> | <input type="checkbox"/> | <input type="checkbox"/> | <input checked="" type="checkbox"/> |
| 31. I will encourage mothers to give formula as well as breast milk if the infant is 6 months old. | <input checked="" type="checkbox"/> | <input type="checkbox"/> | <input type="checkbox"/> | <input type="checkbox"/> | <input type="checkbox"/> | <input type="checkbox"/> | <input type="checkbox"/>            |
| 32. I will make sure the infant is burped sufficiently after a milk feeding.                       | <input type="checkbox"/>            | <input type="checkbox"/> | <input type="checkbox"/> | <input type="checkbox"/> | <input type="checkbox"/> | <input type="checkbox"/> | <input checked="" type="checkbox"/> |
| 33. I will correct any inaccurate information regarding breastfeeding.                             | <input type="checkbox"/>            | <input type="checkbox"/> | <input type="checkbox"/> | <input type="checkbox"/> | <input type="checkbox"/> | <input type="checkbox"/> | <input checked="" type="checkbox"/> |
| 34. I will disseminate information on the benefits of breastfeeding.                               | <input type="checkbox"/>            | <input type="checkbox"/> | <input type="checkbox"/> | <input type="checkbox"/> | <input type="checkbox"/> | <input type="checkbox"/> | <input checked="" type="checkbox"/> |



## **SECTION B: PROVIDING COMPLEMENTARY FEEDING**

| <b>1</b>                                                                                         | <b>2</b>                            | <b>3</b>                 | <b>4</b>                 | <b>5</b>                 |                          |                          |                                     |
|--------------------------------------------------------------------------------------------------|-------------------------------------|--------------------------|--------------------------|--------------------------|--------------------------|--------------------------|-------------------------------------|
| <b>Strongly disagree</b>                                                                         | <b>Disagree</b>                     | <b>Not sure</b>          | <b>Agree</b>             | <b>Strongly agree</b>    |                          |                          |                                     |
|                                                                                                  |                                     |                          | <b>1</b>                 | <b>2</b>                 | <b>3</b>                 | <b>4</b>                 | <b>5</b>                            |
| 1. I believe complementary food is important.                                                    | <input type="checkbox"/>            | <input type="checkbox"/> | <input type="checkbox"/> | <input type="checkbox"/> | <input type="checkbox"/> | <input type="checkbox"/> | <input checked="" type="checkbox"/> |
| 2. I think children should be given a variety of foods.                                          | <input type="checkbox"/>            | <input type="checkbox"/> | <input type="checkbox"/> | <input type="checkbox"/> | <input type="checkbox"/> | <input type="checkbox"/> | <input checked="" type="checkbox"/> |
| 3. I think the food preparation for the children is tedious.                                     | <input checked="" type="checkbox"/> | <input type="checkbox"/> | <input type="checkbox"/> | <input type="checkbox"/> | <input type="checkbox"/> | <input type="checkbox"/> | <input type="checkbox"/>            |
| 4. I think the food texture should be gradually changed according to the child's age.            | <input type="checkbox"/>            | <input type="checkbox"/> | <input type="checkbox"/> | <input type="checkbox"/> | <input type="checkbox"/> | <input type="checkbox"/> | <input checked="" type="checkbox"/> |
| 5. I think breastfeeding should be continued in addition to complementary food.                  | <input type="checkbox"/>            | <input type="checkbox"/> | <input type="checkbox"/> | <input type="checkbox"/> | <input type="checkbox"/> | <input type="checkbox"/> | <input checked="" type="checkbox"/> |
| 6. I think complementary food should be given in the correct quantity.                           | <input type="checkbox"/>            | <input type="checkbox"/> | <input type="checkbox"/> | <input type="checkbox"/> | <input type="checkbox"/> | <input type="checkbox"/> | <input checked="" type="checkbox"/> |
| 7. I think the feeding frequency should be increased according to the child's age.               | <input type="checkbox"/>            | <input type="checkbox"/> | <input type="checkbox"/> | <input type="checkbox"/> | <input type="checkbox"/> | <input type="checkbox"/> | <input checked="" type="checkbox"/> |
| 8. I believe children should be encouraged when they are feeding.                                | <input type="checkbox"/>            | <input type="checkbox"/> | <input type="checkbox"/> | <input type="checkbox"/> | <input type="checkbox"/> | <input type="checkbox"/> | <input checked="" type="checkbox"/> |
| 9. I believe children should take in more water when they are sick.                              | <input type="checkbox"/>            | <input type="checkbox"/> | <input type="checkbox"/> | <input type="checkbox"/> | <input type="checkbox"/> | <input type="checkbox"/> | <input checked="" type="checkbox"/> |
| 10. I assume instant infant food is sufficient for the children during the day.                  | <input checked="" type="checkbox"/> | <input type="checkbox"/> | <input type="checkbox"/> | <input type="checkbox"/> | <input type="checkbox"/> | <input type="checkbox"/> | <input type="checkbox"/>            |
| 11. I think complementary food should be introduced at an appropriate age.                       | <input type="checkbox"/>            | <input type="checkbox"/> | <input type="checkbox"/> | <input type="checkbox"/> | <input type="checkbox"/> | <input type="checkbox"/> | <input checked="" type="checkbox"/> |
| 12. I think a banana is suitable for a 3-month-old infant.                                       | <input checked="" type="checkbox"/> | <input type="checkbox"/> | <input type="checkbox"/> | <input type="checkbox"/> | <input type="checkbox"/> | <input type="checkbox"/> | <input type="checkbox"/>            |
| 13. I think breastfeeding can be discontinued after the introduction of complementary food.      | <input checked="" type="checkbox"/> | <input type="checkbox"/> | <input type="checkbox"/> | <input type="checkbox"/> | <input type="checkbox"/> | <input type="checkbox"/> | <input type="checkbox"/>            |
| 14. I believe interacting with children is important during feeding.                             | <input type="checkbox"/>            | <input type="checkbox"/> | <input type="checkbox"/> | <input type="checkbox"/> | <input type="checkbox"/> | <input type="checkbox"/> | <input checked="" type="checkbox"/> |
| 15. I believe children are healthier if complementary food is introduced at the age of 4 months. | <input checked="" type="checkbox"/> | <input type="checkbox"/> | <input type="checkbox"/> | <input type="checkbox"/> | <input type="checkbox"/> | <input type="checkbox"/> | <input type="checkbox"/>            |
| 16. I believe children are healthy when they have adequate complementary food.                   | <input type="checkbox"/>            | <input type="checkbox"/> | <input type="checkbox"/> | <input type="checkbox"/> | <input type="checkbox"/> | <input type="checkbox"/> | <input checked="" type="checkbox"/> |
| 17. I believe tea is good for a child's health.                                                  | <input checked="" type="checkbox"/> | <input type="checkbox"/> | <input type="checkbox"/> | <input type="checkbox"/> | <input type="checkbox"/> | <input type="checkbox"/> | <input type="checkbox"/>            |

| 1                                                                                          | 2                                   | 3                        | 4                        | 5                        |                          |                                     |   |
|--------------------------------------------------------------------------------------------|-------------------------------------|--------------------------|--------------------------|--------------------------|--------------------------|-------------------------------------|---|
| Strongly disagree                                                                          | Disagree                            | Not sure                 | Agree                    | Strongly agree           |                          |                                     |   |
|                                                                                            |                                     |                          | 1                        | 2                        | 3                        | 4                                   | 5 |
| 18. I think instant infant food is of a better quality than home cooked food.              | <input checked="" type="checkbox"/> | <input type="checkbox"/> | <input type="checkbox"/> | <input type="checkbox"/> | <input type="checkbox"/> |                                     |   |
| 19. I think vegetables are not suitable for children.                                      | <input checked="" type="checkbox"/> | <input type="checkbox"/> | <input type="checkbox"/> | <input type="checkbox"/> | <input type="checkbox"/> |                                     |   |
| 20. I think it is appropriate for children to have their meals in front of the television. | <input checked="" type="checkbox"/> | <input type="checkbox"/> | <input type="checkbox"/> | <input type="checkbox"/> | <input type="checkbox"/> |                                     |   |
| 21. I think instant infant food is good for children.                                      | <input checked="" type="checkbox"/> | <input type="checkbox"/> | <input type="checkbox"/> | <input type="checkbox"/> | <input type="checkbox"/> |                                     |   |
| 22. I am happy to prepare a variety of foods for the children.                             | <input type="checkbox"/>            | <input type="checkbox"/> | <input type="checkbox"/> | <input type="checkbox"/> | <input type="checkbox"/> | <input checked="" type="checkbox"/> |   |
| 23. I am happy to interact with the children during a meal.                                | <input type="checkbox"/>            | <input type="checkbox"/> | <input type="checkbox"/> | <input type="checkbox"/> | <input type="checkbox"/> | <input checked="" type="checkbox"/> |   |
| 24. I am happy seeing children eating in front of the television.                          | <input checked="" type="checkbox"/> | <input type="checkbox"/> | <input type="checkbox"/> | <input type="checkbox"/> | <input type="checkbox"/> |                                     |   |
| 25. I am tired of preparing the children's meals.                                          | <input checked="" type="checkbox"/> | <input type="checkbox"/> | <input type="checkbox"/> | <input type="checkbox"/> | <input type="checkbox"/> |                                     |   |
| 26. I do not like giving vegetables to children.                                           | <input checked="" type="checkbox"/> | <input type="checkbox"/> | <input type="checkbox"/> | <input type="checkbox"/> | <input type="checkbox"/> |                                     |   |
| 27. I am happy to cook food for the children.                                              | <input type="checkbox"/>            | <input type="checkbox"/> | <input type="checkbox"/> | <input type="checkbox"/> | <input type="checkbox"/> | <input checked="" type="checkbox"/> |   |
| 28. I am comfortable using instant infant food.                                            | <input checked="" type="checkbox"/> | <input type="checkbox"/> | <input type="checkbox"/> | <input type="checkbox"/> | <input type="checkbox"/> |                                     |   |
| 29. I will let the children eat whatever they like.                                        | <input checked="" type="checkbox"/> | <input type="checkbox"/> | <input type="checkbox"/> | <input type="checkbox"/> | <input type="checkbox"/> |                                     |   |
| 30. I will discuss the children's nutritional plan with the childcare center supervisor.   | <input type="checkbox"/>            | <input type="checkbox"/> | <input type="checkbox"/> | <input type="checkbox"/> | <input type="checkbox"/> | <input checked="" type="checkbox"/> |   |
| 31. I will interact with the children during their meals.                                  | <input type="checkbox"/>            | <input type="checkbox"/> | <input type="checkbox"/> | <input type="checkbox"/> | <input type="checkbox"/> | <input checked="" type="checkbox"/> |   |
| 32. I will give the same food to all of the infants and children.                          | <input checked="" type="checkbox"/> | <input type="checkbox"/> | <input type="checkbox"/> | <input type="checkbox"/> | <input type="checkbox"/> |                                     |   |
| 33. I will provide time for the children to eat.                                           | <input type="checkbox"/>            | <input type="checkbox"/> | <input type="checkbox"/> | <input type="checkbox"/> | <input type="checkbox"/> | <input checked="" type="checkbox"/> |   |
| 34. I will give encouragement for the children to eat.                                     | <input type="checkbox"/>            | <input type="checkbox"/> | <input type="checkbox"/> | <input type="checkbox"/> | <input type="checkbox"/> | <input checked="" type="checkbox"/> |   |
| 35. I will try a combination or a variety of foods if the children refuse to eat.          | <input type="checkbox"/>            | <input type="checkbox"/> | <input type="checkbox"/> | <input type="checkbox"/> | <input type="checkbox"/> | <input checked="" type="checkbox"/> |   |
| 36. I will give the children a soft diet (e.g., congee) when they are sick.                | <input type="checkbox"/>            | <input type="checkbox"/> | <input type="checkbox"/> | <input type="checkbox"/> | <input type="checkbox"/> | <input checked="" type="checkbox"/> |   |
| 37. I will encourage the children to drink more water when they are sick.                  | <input type="checkbox"/>            | <input type="checkbox"/> | <input type="checkbox"/> | <input type="checkbox"/> | <input type="checkbox"/> | <input checked="" type="checkbox"/> |   |

| 1                 | 2        | 3        | 4     | 5              |
|-------------------|----------|----------|-------|----------------|
| Strongly disagree | Disagree | Not sure | Agree | Strongly agree |

|                                                                              | 1                                   | 2                        | 3                        | 4                        | 5                                   |
|------------------------------------------------------------------------------|-------------------------------------|--------------------------|--------------------------|--------------------------|-------------------------------------|
| 38. I will give frequent meals to children recovering from illnesses.        | <input type="checkbox"/>            | <input type="checkbox"/> | <input type="checkbox"/> | <input type="checkbox"/> | <input checked="" type="checkbox"/> |
| 39. I will penalize the children for refusing to eat.                        | <input checked="" type="checkbox"/> | <input type="checkbox"/> | <input type="checkbox"/> | <input type="checkbox"/> | <input type="checkbox"/>            |
| 40. I will encourage the children to eat while watching television.          | <input checked="" type="checkbox"/> | <input type="checkbox"/> | <input type="checkbox"/> | <input type="checkbox"/> | <input type="checkbox"/>            |
| 41. I will use different methods of encouragement if a child refuses to eat. | <input type="checkbox"/>            | <input type="checkbox"/> | <input type="checkbox"/> | <input type="checkbox"/> | <input checked="" type="checkbox"/> |
| 42. I will encourage a child to feed him/herself.                            | <input type="checkbox"/>            | <input type="checkbox"/> | <input type="checkbox"/> | <input type="checkbox"/> | <input checked="" type="checkbox"/> |
| 43. I will give different textures of food according to a child's age.       | <input type="checkbox"/>            | <input type="checkbox"/> | <input type="checkbox"/> | <input type="checkbox"/> | <input checked="" type="checkbox"/> |

# PRACTICE

Answer all of the questions according to the scale below. Check (✓) your choice of answer.

## BREASTFEEDING, INFANT FORMULA, AND COMPLEMENTARY FOOD

| 1                          | 2                               | 3                                      | 4                           |
|----------------------------|---------------------------------|----------------------------------------|-----------------------------|
| <b>Never</b><br>(never do) | <b>Seldom</b><br>(once a month) | <b>Frequent</b><br>(2-3 days per week) | <b>Always</b><br>(everyday) |

### A. Handling and storing breast milk at the childcare center

|                                                                                                                              | 1                                   | 2                        | 3                        | 4                                   |
|------------------------------------------------------------------------------------------------------------------------------|-------------------------------------|--------------------------|--------------------------|-------------------------------------|
| 1. I make sure every milk storage container is labelled with the infant's name.                                              | <input type="checkbox"/>            | <input type="checkbox"/> | <input type="checkbox"/> | <input checked="" type="checkbox"/> |
| 2. I check that every expressed breast milk container that we receive has the infant's name and the date of milk expression. | <input type="checkbox"/>            | <input type="checkbox"/> | <input type="checkbox"/> | <input checked="" type="checkbox"/> |
| 3. I place the expressed breast milk in the refrigerator immediately upon receiving it from the parents.                     | <input type="checkbox"/>            | <input type="checkbox"/> | <input type="checkbox"/> | <input checked="" type="checkbox"/> |
| 4. I make sure that the expressed breast milk stored in the lower part of the refrigerator does not exceed 48 hours.         | <input type="checkbox"/>            | <input type="checkbox"/> | <input type="checkbox"/> | <input checked="" type="checkbox"/> |
| 5. I store again the remaining unused expressed breast milk.                                                                 | <input checked="" type="checkbox"/> | <input type="checkbox"/> | <input type="checkbox"/> | <input type="checkbox"/>            |
| 6. I give the infants the expressed breast milk that was stored earlier first.                                               | <input type="checkbox"/>            | <input type="checkbox"/> | <input type="checkbox"/> | <input checked="" type="checkbox"/> |

### B. Giving mother's milk to the infant

|                                                                                       | 1                                   | 2                        | 3                        | 4                                   |
|---------------------------------------------------------------------------------------|-------------------------------------|--------------------------|--------------------------|-------------------------------------|
| 1. I wash my hands with water and soap before feeding milk to an infant.              | <input type="checkbox"/>            | <input type="checkbox"/> | <input type="checkbox"/> | <input checked="" type="checkbox"/> |
| 2. I thaw expressed breast milk in the chilled section of the refrigerator.           | <input type="checkbox"/>            | <input type="checkbox"/> | <input type="checkbox"/> | <input checked="" type="checkbox"/> |
| 3. I thaw expressed breast milk by putting it in lukewarm water.                      | <input type="checkbox"/>            | <input type="checkbox"/> | <input type="checkbox"/> | <input checked="" type="checkbox"/> |
| 4. I thaw expressed breast milk in the microwave.                                     | <input checked="" type="checkbox"/> | <input type="checkbox"/> | <input type="checkbox"/> | <input type="checkbox"/>            |
| 5. I discard seemingly spoiled expressed breast milk (e.g., smells sour, discolored). | <input type="checkbox"/>            | <input type="checkbox"/> | <input type="checkbox"/> | <input checked="" type="checkbox"/> |

| 1                                                                                  | 2                                   | 3                               | 4                        |                                     |
|------------------------------------------------------------------------------------|-------------------------------------|---------------------------------|--------------------------|-------------------------------------|
| Never<br>(never do)                                                                | Seldom<br>(once a month)            | Frequent<br>(2-3 days per week) | Always<br>(everyday)     |                                     |
|                                                                                    | 1                                   | 2                               | 3                        | 4                                   |
| 6. I give expressed breast milk at an appropriate temperature.                     | <input type="checkbox"/>            | <input type="checkbox"/>        | <input type="checkbox"/> | <input checked="" type="checkbox"/> |
| 7. I give expressed breast milk within an hour after thawing.                      | <input type="checkbox"/>            | <input type="checkbox"/>        | <input type="checkbox"/> | <input checked="" type="checkbox"/> |
| 8. I shake expressed breast milk before giving it to an infant.                    | <input type="checkbox"/>            | <input type="checkbox"/>        | <input type="checkbox"/> | <input checked="" type="checkbox"/> |
| 9. I discard the remaining expressed breast milk if it is not completely consumed. | <input type="checkbox"/>            | <input type="checkbox"/>        | <input type="checkbox"/> | <input checked="" type="checkbox"/> |
| 10. I give expressed breast milk according to the infant’s demand.                 | <input type="checkbox"/>            | <input type="checkbox"/>        | <input type="checkbox"/> | <input checked="" type="checkbox"/> |
| 11. I give expressed breast milk to the infant using a cup/spoon/syringe.          | <input type="checkbox"/>            | <input type="checkbox"/>        | <input type="checkbox"/> | <input checked="" type="checkbox"/> |
| 12. I burp the infant after a breast milk feeding.                                 | <input type="checkbox"/>            | <input type="checkbox"/>        | <input type="checkbox"/> | <input checked="" type="checkbox"/> |
| 13. I give plain water after a breast milk feeding.                                | <input checked="" type="checkbox"/> | <input type="checkbox"/>        | <input type="checkbox"/> | <input type="checkbox"/>            |

### C. Preparation and handling of the infant formula

|                                                                                            | 1                        | 2                        | 3                        | 4                                   |
|--------------------------------------------------------------------------------------------|--------------------------|--------------------------|--------------------------|-------------------------------------|
| 1. I clean the kitchen surfaces with soap before preparing the formula.                    | <input type="checkbox"/> | <input type="checkbox"/> | <input type="checkbox"/> | <input checked="" type="checkbox"/> |
| 2. I wash my hands with water and soap before preparing the formula.                       | <input type="checkbox"/> | <input type="checkbox"/> | <input type="checkbox"/> | <input checked="" type="checkbox"/> |
| 3. I cook the water until it is boiling.                                                   | <input type="checkbox"/> | <input type="checkbox"/> | <input type="checkbox"/> | <input checked="" type="checkbox"/> |
| 4. I prepare the formula according to the instructions given on the formula label.         | <input type="checkbox"/> | <input type="checkbox"/> | <input type="checkbox"/> | <input checked="" type="checkbox"/> |
| 5. I prepare the formula with water at a temperature of 70°C.                              | <input type="checkbox"/> | <input type="checkbox"/> | <input type="checkbox"/> | <input checked="" type="checkbox"/> |
| 6. I add the formula powder in the right quantity.                                         | <input type="checkbox"/> | <input type="checkbox"/> | <input type="checkbox"/> | <input checked="" type="checkbox"/> |
| 7. I shake the milk bottle with its cap in place to make sure that the milk is well-mixed. | <input type="checkbox"/> | <input type="checkbox"/> | <input type="checkbox"/> | <input checked="" type="checkbox"/> |
| 8. I put the milk bottle under running tap water to lower its temperature.                 | <input type="checkbox"/> | <input type="checkbox"/> | <input type="checkbox"/> | <input checked="" type="checkbox"/> |

| 1                   | 2                        | 3                               | 4                    |
|---------------------|--------------------------|---------------------------------|----------------------|
| Never<br>(never do) | Seldom<br>(once a month) | Frequent<br>(2-3 days per week) | Always<br>(everyday) |

#### D. Handling and cleaning the milk bottle

|                                                                | 1                        | 2                        | 3                        | 4                                   |
|----------------------------------------------------------------|--------------------------|--------------------------|--------------------------|-------------------------------------|
| 1. I sterilize the milk bottle before use.                     | <input type="checkbox"/> | <input type="checkbox"/> | <input type="checkbox"/> | <input checked="" type="checkbox"/> |
| 2. I place the milk bottle in boiling water for sterilization. | <input type="checkbox"/> | <input type="checkbox"/> | <input type="checkbox"/> | <input checked="" type="checkbox"/> |
| 3. I keep sterilized milk bottles in a closed container.       | <input type="checkbox"/> | <input type="checkbox"/> | <input type="checkbox"/> | <input checked="" type="checkbox"/> |
| 4. I wash the milk bottles using a soft sponge.                | <input type="checkbox"/> | <input type="checkbox"/> | <input type="checkbox"/> | <input checked="" type="checkbox"/> |
| 5. I wash the milk bottles using soap.                         | <input type="checkbox"/> | <input type="checkbox"/> | <input type="checkbox"/> | <input checked="" type="checkbox"/> |

#### E. Preparing, handling, and storing food

|                                                                                                       | 1                        | 2                        | 3                        | 4                                   |
|-------------------------------------------------------------------------------------------------------|--------------------------|--------------------------|--------------------------|-------------------------------------|
| 1. I wash my hands with water and soap before preparing food.                                         | <input type="checkbox"/> | <input type="checkbox"/> | <input type="checkbox"/> | <input checked="" type="checkbox"/> |
| 2. I make sure the children's hands are washed with water and soap before they eat.                   | <input type="checkbox"/> | <input type="checkbox"/> | <input type="checkbox"/> | <input checked="" type="checkbox"/> |
| 3. I make sure that the plates, cups, spoons, and forks that are to be used are clean.                | <input type="checkbox"/> | <input type="checkbox"/> | <input type="checkbox"/> | <input checked="" type="checkbox"/> |
| 4. I make sure the plates and cups that are to be used are not cracked or scratched.                  | <input type="checkbox"/> | <input type="checkbox"/> | <input type="checkbox"/> | <input checked="" type="checkbox"/> |
| 5. I make sure that the cooked food kept at room temperature is given to the children within 2 hours. | <input type="checkbox"/> | <input type="checkbox"/> | <input type="checkbox"/> | <input checked="" type="checkbox"/> |

#### F. Responsive feeding

|                                                                   | 1                                   | 2                        | 3                        | 4                                   |
|-------------------------------------------------------------------|-------------------------------------|--------------------------|--------------------------|-------------------------------------|
| 1. I interact with the children during the meal.                  | <input type="checkbox"/>            | <input type="checkbox"/> | <input type="checkbox"/> | <input checked="" type="checkbox"/> |
| 2. I encourage the children to feed themselves.                   | <input type="checkbox"/>            | <input type="checkbox"/> | <input type="checkbox"/> | <input checked="" type="checkbox"/> |
| 3. I feed the children when there are signs of hunger only.       | <input checked="" type="checkbox"/> | <input type="checkbox"/> | <input type="checkbox"/> | <input type="checkbox"/>            |
| 4. I give the children time to finish their food.                 | <input type="checkbox"/>            | <input type="checkbox"/> | <input type="checkbox"/> | <input checked="" type="checkbox"/> |
| 5. I do not scold or penalize the children if they refuse to eat. | <input type="checkbox"/>            | <input type="checkbox"/> | <input type="checkbox"/> | <input checked="" type="checkbox"/> |
